# Supplementary material for: Associations between neighbourhood social cohesion and subjective well-being in two different informal settlement types in Delhi, India: a quantitative cross-sectional study
Source: PubMed Central journal article supplement — BMJ Open. 2023 Apr 11;13(4):e067680. doi: 10.1136/bmjopen-2022-067680 (PMC10580277; doi:10.1136/bmjopen-2022-067680), 2023-04-11
Supplement: bmjopen-2022-067680supp001.pdf [file bmjopen-2022-067680supp001.pdf]

## Supplemental Material

Supplemental tables 1 and 2 give the coefficient estimates of the average marginal component effects with standard errors in parenthesis for figures 2 and 3 in main article. Supplemental table 3 shows the bivariate correlations between Neighbourhood Cohesion Index, Subjective Well-Being and socio-demographic covariates.

**Supplemental Table 1 Neighbourhood Cohesion Index estimated averaged marginal component effects for Sanjay Colony with 95% CIs.**

| <i>Item</i>  | <i>Item description</i>                                                                                                          | Sanjay Colony(=1)     |
|--------------|----------------------------------------------------------------------------------------------------------------------------------|-----------------------|
| <b>SOC</b>   | <b>Sense of Community</b>                                                                                                        |                       |
| NCI8 (SOC)   | I agree with most of my neighbourhood about what's important in life                                                             | -0.055** (0.023)      |
| NCI9 (SOC)   | I believe my neighbours would help me in an emergency                                                                            | 0.093*** (0.025)      |
| NCI10 (SOC)  | I feel loyal to people in my neighbourhood                                                                                       | -0.028 (0.035)        |
| NCI12 (SOC)  | I'd be willing to work with others to improve my neighbourhood                                                                   | 0.095*** (0.025)      |
| NCI14 (SOC)  | I think of myself as similar to people who live in this neighbourhood                                                            | -0.001 (0.033)        |
| NCI16 (SOC)  | A feeling of fellowship runs deep in this neighbourhood                                                                          | -0.010 (0.025)        |
| NCI17 (SOC)  | I regularly stop to talk with people in my neighbourhood                                                                         | 0.027 (0.031)         |
| NCI18 (SOC)  | Living in this neighbourhood gives me a sense of community                                                                       | 0.102*** (0.028)      |
| <b>NEI</b>   | <b>Neighbouring</b>                                                                                                              |                       |
| NCI3 (NEI)   | I visit with my neighbours in their homes                                                                                        | -0.018 (0.027)        |
| NCI4 (NEI)   | The friendships I have with people in my neighbourhood mean a lot                                                                | -0.097*** (0.028)     |
| NCI6 (NEI)   | If people in my neighbourhood were planning something I'd think of it as something 'we' were doing rather than 'they' were doing | -0.001 (0.024)        |
| NCI7 (NEI)   | If I need advice, I could go to someone in my neighbourhood                                                                      | -0.030 (0.024)        |
| NCI11 (NEI)  | I borrow things and exchange favours with my neighbours                                                                          | 0.002 (0.028)         |
| NCI15 (NEI)  | I have never invited neighbours over to my house to visit (R)                                                                    | -0.048** (0.016)      |
| <b>ATTR</b>  | <b>Attraction to neighbourhood</b>                                                                                               |                       |
| NCI1 (ATTR)  | Overall, I am very attracted to living in this neighbourhood                                                                     | -0.073* (0.030)       |
| NCI2 (ATTR)  | I feel like I belong to this neighbourhood                                                                                       | 0.225*** (0.027)      |
| NCI5 (ATTR)  | Given the opportunity, I would like to move out of this neighbourhood (R)                                                        | -0.003 (0.015)        |
| NCI13 (ATTR) | I plan to remain a resident of this neighbourhood for a number of years                                                          | -0.023 (0.021)        |
| Constant     |                                                                                                                                  | -0.157 (0.137)        |
|              |                                                                                                                                  | P[F(18, 620)=16.62]   |
|              |                                                                                                                                  | <0.001                |
|              |                                                                                                                                  | R <sup>2</sup> =0.325 |

Analysis includes 639 observations. Coefficient estimates of the average marginal component effects with standard errors in parenthesis. \*\*\*p<0.001, \*\*p<0.01, \*p<0.05. The percentage points (pp) estimates for Sanjay Colony (=1) with the base group being Bhalswa (=0).

**Supplemental Table 2 Well-being estimated averaged marginal component effects for Sanjay Colony with 95% CIs**

| <i>Well being</i> |                                                                                               |                       |
|-------------------|-----------------------------------------------------------------------------------------------|-----------------------|
| <i>item</i>       | <i>Item description</i>                                                                       | Sanjay Colony(=1)     |
|                   | <b>Well-being</b>                                                                             |                       |
| Satisfaction      | Overall, how satisfied are you with life as a whole these days?                               | 0.048** (0.016)       |
| Freedom           | How much freedom of choice and control do you feel you have over the way your life turns out? | 0.048*** (0.015)      |
| Happiness         | How happy did you feel yesterday?                                                             | -0.013 (0.015)        |
| Purpose           | Do you feel your life has important purpose or meaning?                                       | 0.017 (0.013)         |
|                   |                                                                                               | P[F(4, 634)]=14.49]   |
|                   |                                                                                               | <0.001                |
|                   |                                                                                               | R <sup>2</sup> =0.084 |

Analysis includes 639 observations. Coefficient estimates of the average marginal component effects with standard errors in parenthesis. \*\*\*p<0.001, \*\*p<0.01, \*p<0.05. The percentage points (pp) estimates for Sanjay Colony (=1) with the base group being Bhalswa (=0).

**Supplemental Table 3. Bivariate Correlations between Neighbourhood Cohesion Index, Subjective Well-Being and socio-demographic covariates**

|                             | Total NCI | SWB     | Trust    | Age      | Length of residence | Education | Work out | Income   | Daily    | Regular  |
|-----------------------------|-----------|---------|----------|----------|---------------------|-----------|----------|----------|----------|----------|
| Total NCI                   |           | 0.145*  | 0.618**  | 0.006    | 0.157**             | 0.090     | 0.047    | 0.072    | -0.090   | 0.083    |
| Subjective well-being (SWB) | 0.264**   |         | 0.031    | -0.036   | 0.047               | 0.043     | 0.108    | 0.119*   | -0.219** | 0.134*   |
| Trust                       | 0.533**   | 0.121*  |          | -0.015   | 0.020               | 0.034     | 0.064    | -0.015   | 0.002    | 0.045    |
| Age                         | 0.005     | 0.004   | -0.035   |          | 0.353**             | -0.272**  | -0.274** | -0.045   | -0.009   | -0.210** |
| Length residence            | 0.171**   | -0.117* | 0.145**  | 0.193**  |                     | -0.098    | -0.066   | 0.076    | -0.194** | 0.083    |
| Education                   | -0.019    | 0.095   | 0.016    | -0.332** | -0.093              |           | -0.047   | 0.196**  | -0.090   | 0.035    |
| Work outside community      | -0.160**  | 0.103   | -0.238** | -0.318** | -0.141*             | 0.118*    |          | -0.155** | 0.188**  | 0.318**  |
| Income                      | 0.123*    | 0.165** | 0.132*   | 0.030    | 0.079               | 0.175**   | 0.081    |          | -0.280** | -0.025   |
| Daily paid wage earner      | -0.032    | -0.134* | 0.011    | 0.088    | 0.047               | -0.219**  | -0.216** | -0.258** |          |          |
| Regular employment          | -0.035    | 0.109*  | -0.161** | -0.172** | -0.092              | 0.178**   | 0.469**  | 0.101    |          |          |

Sanjay Colony (above diagonal), Bhalswa (below diagonal)
